# Supplementary material for: Substantially positive contributions of new particle formation to Cloud Condensation Nuclei under low supersaturation in China based on numerical model improvements
Source: Copernicus journal article supplement (doi:10.5194/egusphere-2023-381), 2023-03-28
Supplement: Supplementary file 1 [file egusphere-2023-381-supplement.pdf]

## Supporting Information for

Substantially positive contributions of new particle formation to Cloud Condensation Nuclei under low supersaturation in China based on numerical model improvements

Chupeng Zhang<sup>1#</sup>, Shangfei Hai<sup>2#</sup>, Yang Gao<sup>1\*</sup>, Yuhang Wang<sup>3\*</sup>, Shaoqing Zhang<sup>4,2</sup>, Lifang Sheng<sup>2</sup>, Bin Zhao<sup>5</sup>, Shuxiao Wang<sup>5</sup>, Jingkun Jiang<sup>5</sup>, Xin Huang<sup>6</sup>, Aura Lupascu<sup>7</sup>, Manish Shrivastava<sup>8</sup>, Jerome D. Fast<sup>8</sup>, Wenxuan Cheng<sup>1</sup>, Xiuwen Guo<sup>1</sup>, Ming Chu<sup>1</sup>, Nan Ma<sup>9</sup>, Juan Hong<sup>9</sup>, Qiaoqiao Wang<sup>9</sup>, Xiaohong Yao<sup>1</sup> and Huiwang Gao<sup>1</sup>

<sup>1</sup>Frontiers Science Center for Deep Ocean Multispheres and Earth System, and Key Laboratory of Marine Environmental Science and Ecology, Ministry of Education, Ocean University of China, and Laoshan Laboratory, Qingdao, 266100, China

<sup>2</sup>College of Oceanic and Atmospheric Sciences, Ocean University of China, Qingdao, 266100, China

<sup>3</sup>School of Earth and Atmospheric Sciences, Georgia Institute of Technology, Atlanta, GA, 30332, USA

<sup>4</sup>Frontiers Science Center for Deep Ocean Multispheres and Earth System, and Key Laboratory of Physical Oceanography, Ocean University of China, and Laoshan Laboratory, Qingdao, 266100, China

<sup>5</sup>State Key Joint Laboratory of Environment Simulation and Pollution Control, School of Environment, Tsinghua University, Beijing, 100084 China

<sup>6</sup>School of Atmospheric Sciences, Nanjing University, Nanjing, 210023, China

<sup>7</sup>Institute for Advanced Sustainability Studies, Potsdam D-14467, Germany

<sup>8</sup>Atmospheric Sciences and Global Change Division, Pacific Northwest National Laboratory, Richland, WA, 99354, USA

<sup>9</sup>Institute for Environmental and Climate Research, Jinan University, Guangzhou, 510000, China

#Authors contributed equally to this study.

\*To whom correspondence to: yanggao@ouc.edu.cn, yuhang.wang@eas.gatech.edu

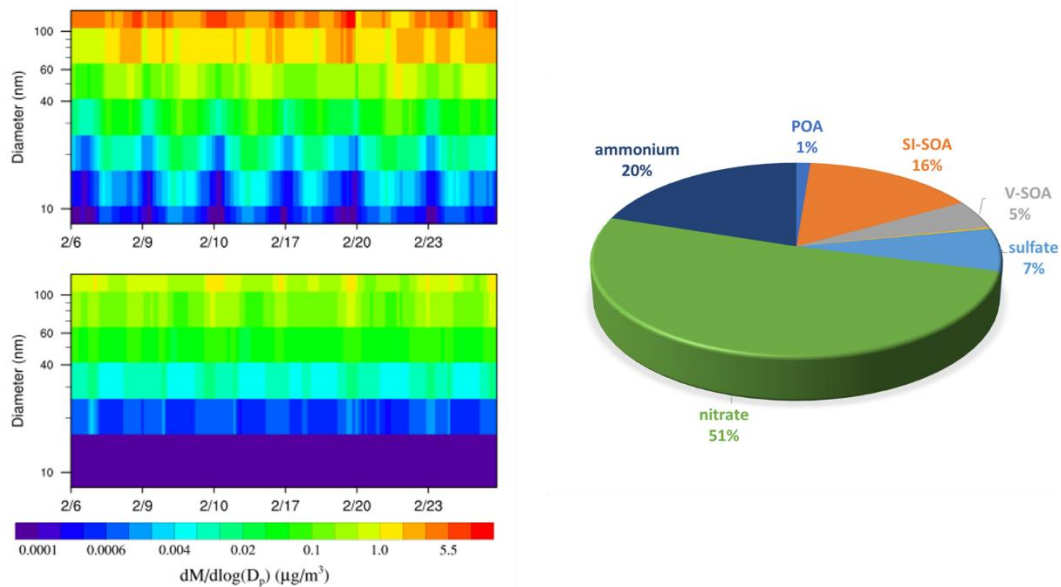

Figure S1 Modeled size resolved mass concentration of primary organic aerosol (POA) in each size bin simulated by (a) MAC and (b) PEP, and the mass fractions of the major chemicals in the 10–40nm particles obtained from the PEP simulations

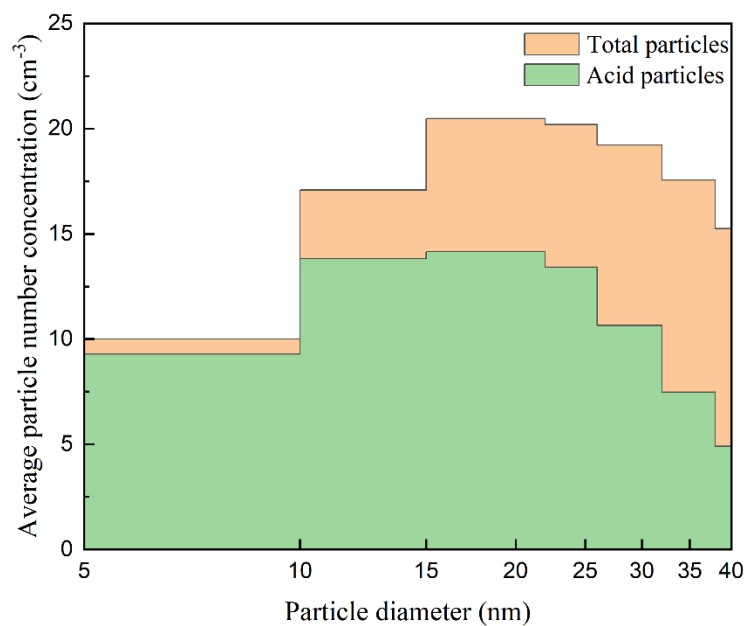

Figure S2 Average particle number concentration of total environmental particles (marked in orange) and acid particles (marked in green) as a function of particle size in Hong Kong from 22 December 2010 to 15 January 2011 as reported by Wang et al. (2014)

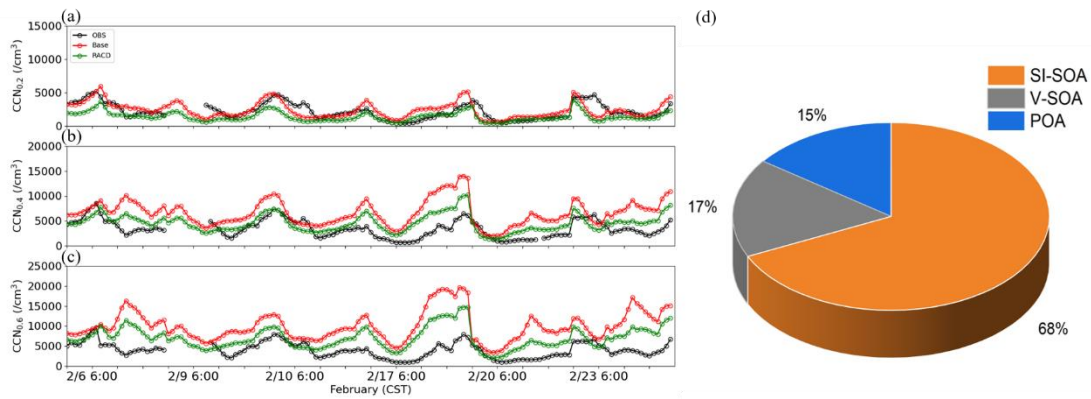

Figure. S3 The time series of (a)  $CCN_{0.2\%}$ , (b)  $CCN_{0.4\%}$  and (c)  $CCN_{0.6\%}$  on NPF days simulated Base (marked in red) and RACD (marked in green) as well as from observations (OBS) (marked in black), and (d) the proportion of different components of organic matter in 1–100nm particles, where yellow represents SI-SOA, grey represents V-SOA, and blue represents POA.

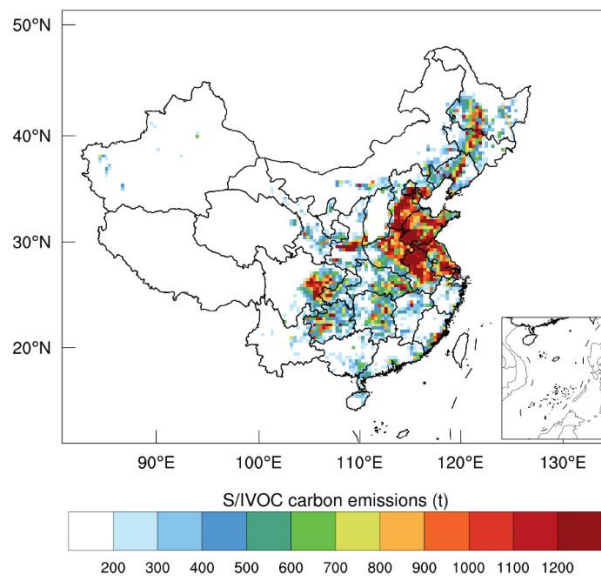

Figure. S4 Spatial distribution of total S/IVOC carbon emissions in mainland China in February 2017

### Reference

Wang D-W, Guo H, Chan C K 2014. Diffusion Sampler for Measurement of Acidic Ultrafine Particles in the Atmosphere. *Aerosol Science and Technology* [J], 48(12): 1236-1246.
